# Supplementary material for: Pasta with Kiwiberry (Actinidia arguta): Effect on Structure, Quality, Consumer Acceptance, and Changes in Bioactivity during Thermal Treatment
Source: MDPI journal article supplement (doi:10.3390/foods11162456), 2022-08-15
Supplement: s1 [file s1]

## Article

# Pasta with Kiwiberry (*Actinidia arguta*): Effect on Structure, Quality, Consumer Acceptance, and Changes in Bioactivity during Thermal Treatment

Agata Osoś <sup>1</sup>, Patrycja Jankowska <sup>1</sup>, Agnieszka Drożdżyńska <sup>2</sup>, Maria Barbara Różańska <sup>3</sup>, Róża Biegańska-Marecik <sup>3</sup>, Hanna Maria Baranowska <sup>4</sup>, Millena Ruszkowska <sup>5</sup>, Miroslava Kačániová <sup>6,7</sup>, Agnieszka Tomkowiak <sup>8</sup>, Marek Kieliszek <sup>9</sup> and Przemysław Łukasz Kowalczewski <sup>3,\*</sup>

<sup>1</sup> Students' Scientific Club of Food Technologists, Poznań University of Life Sciences, 31 Wojska Polskiego St., 60-624 Poznań, Poland

<sup>2</sup> Department of Biotechnology and Food Microbiology, Poznań University of Life Sciences, 48 Wojska Polskiego St., 60-637 Poznań, Poland

<sup>3</sup> Department of Food Technology of Plant Origin, Poznań University of Life Sciences, 31 Wojska Polskiego St., 60-624 Poznań, Poland

<sup>4</sup> Department of Physics and Biophysics, Poznań University of Life Sciences, 38/42 Wojska Polskiego St., 60-637 Poznań, Poland

<sup>5</sup> Faculty of Management and Quality Science, Gdynia Maritime University, 83 Morska St., 81-225 Gdynia, Poland

<sup>6</sup> Institute of Horticulture, Faculty of Horticulture and Landscape Engineering, Slovak University of Agriculture, Tr. A. Hlinku 2, 94976 Nitra, Slovakia

<sup>7</sup> Department of Bioenergy, Food Technology and Microbiology, Institute of Food Technology and Nutrition, University of Rzeszow, 4 Zelwerowicza St, 35-601 Rzeszow, Poland

<sup>8</sup> Department of Genetics and Plant Breeding, Poznań University of Life Sciences, 11 Dojazd St., 60-632 Poznań, Poland

<sup>9</sup> Department of Food Biotechnology and Microbiology, Institute of Food Sciences, Warsaw University of Life Sciences—SGGW, 02-776 Warsaw, Poland

\* Correspondence: przemyslaw.kowalczewski@up.poznan.pl

**Table S1.** Results of consumer rating.

| Parameter      | R                        | K5                        | K10                       | K15                       |
|----------------|--------------------------|---------------------------|---------------------------|---------------------------|
| Appearance     | 7.20 ± 0.31 <sup>a</sup> | 7.32 ± 0.29 <sup>a</sup>  | 7.28 ± 0.70 <sup>a</sup>  | 7.12 ± 0.83 <sup>a</sup>  |
| Color          | 6.68 ± 0.23 <sup>b</sup> | 7.56 ± 0.16 <sup>a</sup>  | 7.12 ± 0.33 <sup>a</sup>  | 7.20 ± 0.71 <sup>ab</sup> |
| Taste          | 7.16 ± 0.14 <sup>a</sup> | 6.92 ± 0.55 <sup>ab</sup> | 6.36 ± 0.91 <sup>bc</sup> | 5.20 ± 1.12 <sup>c</sup>  |
| Flavor         | 7.12 ± 0.19 <sup>a</sup> | 7.12 ± 0.32 <sup>ab</sup> | 6.96 ± 0.55 <sup>b</sup>  | 6.52 ± 0.68 <sup>b</sup>  |
| Texture        | 8.64 ± 0.26 <sup>a</sup> | 7.36 ± 0.34 <sup>b</sup>  | 7.24 ± 0.48 <sup>b</sup>  | 6.36 ± 0.44 <sup>c</sup>  |
| Overall rating | 7.36 ± 0.21 <sup>a</sup> | 7.26 ± 0.22 <sup>a</sup>  | 6.99 ± 0.39 <sup>b</sup>  | 6.48 ± 0.34 <sup>b</sup>  |

Means in the same row followed by different letters indicate significant differences ( $p < 0.05$ ). R - reference pasta without the addition of kiwiberry lyophilizate, K5, K10, and K15 - pasta contained 5%, 10%, and 15% kiwiberry lyophilizate.
